# Supplementary material
Source: publisher figshare collection journal article supplement (https://sage.figshare.com/ndownloader/files/20186358)
Supplement: Supplementary file 1 [file 20186358]

# Access to Halden Technical Reports

Distribution of Halden Reactor Project (HRP) technical reports [i.e., Halden Work Reports (HWRs) and Halden Project Reports (HPRs) is restricted. Requests from verifiable researchers stating a reasonable motivation for access are reviewed on a case-by-case basis. Requests are only granted for individual use for a specific purpose. No distribution is permitted.

Researchers residing in a member country (e.g., the USA) can request access through the member organization (e.g., the NRC). Table S1 provides a list of member countries and organizations. Researchers residing in a non-member country can approach Jon Kvalem, Project Manager of the Halden Project, at [jon.kvalem@ife.no](mailto:jon.kvalem@ife.no).

Table S1

*List of Halden Project member countries and organizations*

| Country | Member Organization |
| --- | --- |
| Norway | Institutt for energiteknikk (IFE) |
| Belgium | Belgian Nuclear Research Centre SCK·CEN |
| Czech Republic | the Czech company UJV Rez a.s. (UJV) |
| Denmark | Technical University of Denmark (DTU) |
| Finland | Finnish Ministry of Employment and the Economy (MEE) |
| France | Electricité de France (EDF) |
| Germany | Gesellschaft für Anlagen- und Reaktorsicherheit mbH (GRS) |
| Hungary | Hungarian Centre for Energy Research (MTA EK), Hungarian Academy of Sciences |
| Japan | Japanese Nuclear Regulation Authority (NRA) |
| Republic of Korea | Korea Atomic Energy Research Institute (KAERI) |
| The Netherlands | Nuclear Research and Consultancy Group (NRG) |
| Russia | Russian Joint-Stock Company TVEL |
| Slovakia | the Slovak company VUJE, a.s. |
| Spain | Spanish Centro de Investigaciones Energéticas Medioambientales y Tecnológicas (CIEMAT) |
| Sweden | Swedish Radiation Safety Authority (SSM) |
| United Kingdom | National Nuclear Laboratory Limited (NNL) |
| United Arab Emirates | Federal Authority for Nuclear Regulation (FANR) |
| United States | United States Nuclear Regulatory Commission (USNRC) |
